# Supplementary material
Source: Springer Nature journal article supplement (https://www.springermedizin.de/resource/supplementary/12890_2012_441_MOESM1_ESM.pdf/9505228)

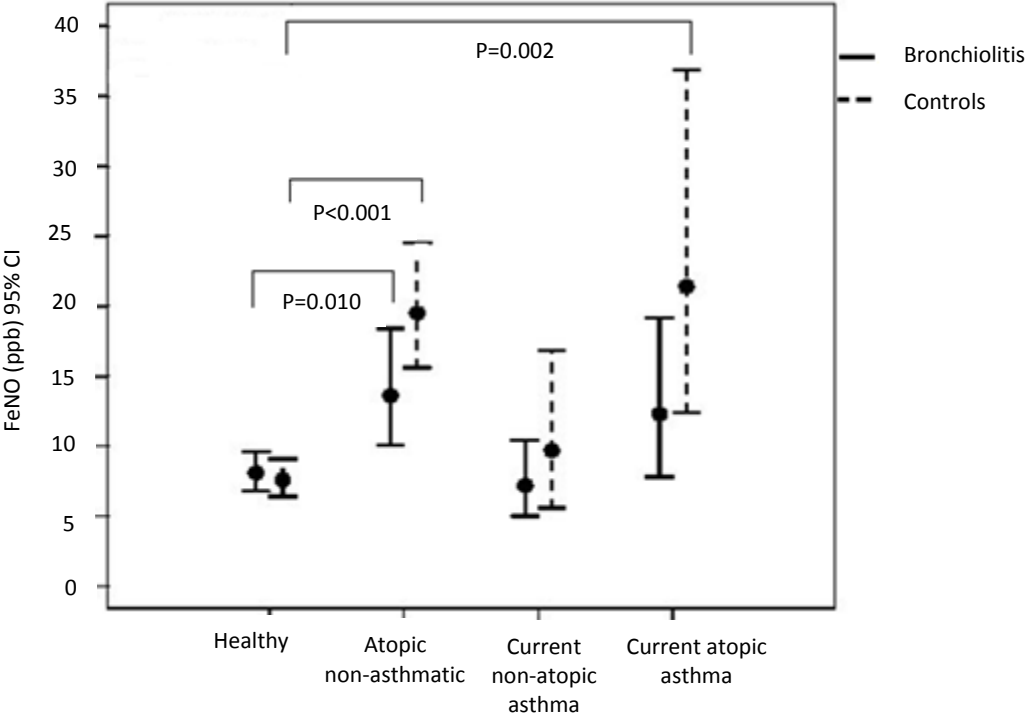

Supplement: MOESM1 [file 9505228]
